# Supplementary material
Source: publisher site journal article supplement (https://www.spandidos-publications.com/4034/downloadSupplementary)

Figure S1. Representative images of culture plates of colony formation assay. Exponentially dividing cells were treated with acetone/methanol extracts of *Musa basjoo* at a dose range of 12.5-200  $\mu\text{g/ml}$  for 7 days in DMEM/5% FBS. After washing with phosphate-buffered saline, colonies were stained with Giemsa solution and then counted.

HCT116 (acetone extract)

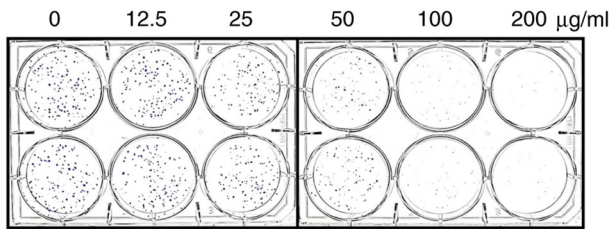

MCF-7 (acetone extract)

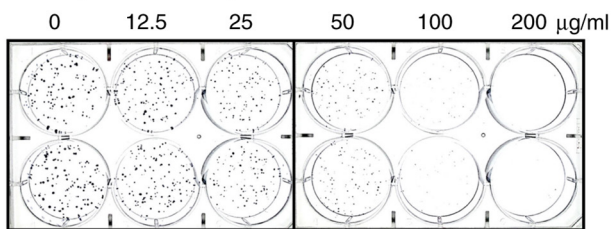

Figure S2. Representative histological images in major organ sites [HE staining; x100 (lung, liver and kidney) or x200 (heart) magnification]. Upper and lower panels indicate control and MB treatment groups, respectively. No MB treatment-specific toxicities were evident in the indicated organ sites. MB, *Musa basjoo*.

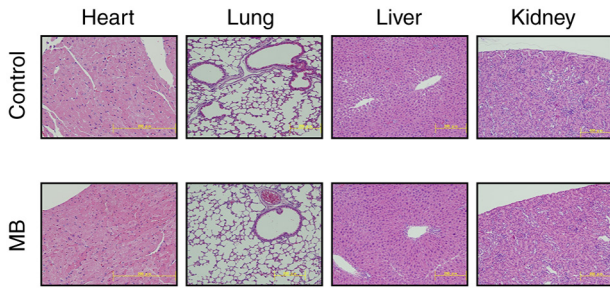

Supplement: Supplementary file 1 [file downloadSupplementary]
